# Supplementary material for: Adherence and Effect of Home-Based Rehabilitation with Telemonitoring Support in Patients with Chronic Non-Specific Low Back Pain: A Pilot Study
Source: MDPI journal article supplement (doi:10.3390/ijerph20021504), 2023-01-13

The comprehensive rehabilitation programme included a combination of several rehabilitation methods recommended in the treatment of LBP, specifically basics of back school, three core stability exercises, two stretching exercises, and a respiratory muscle training exercise.

**Back school** included basic education about the anatomy of the back, optimal posture, and ergonomics. This information was provided by the physiotherapist.

**Core stability exercises – dynamic neuromuscular stabilisation** based on neurodevelopmental aspects of motor control (<https://www.rehabps.com/>)

**The first exercise with increasing difficulty level**

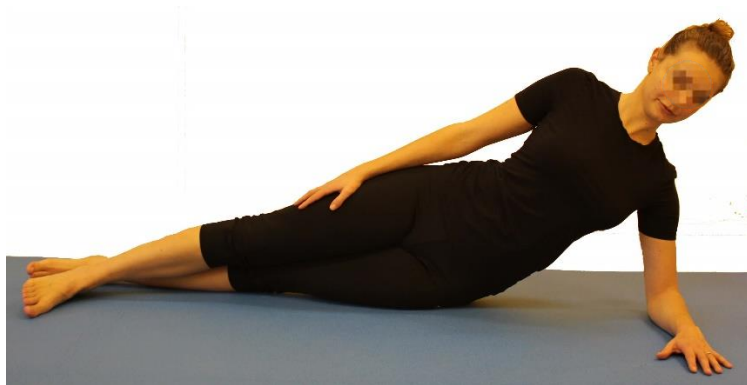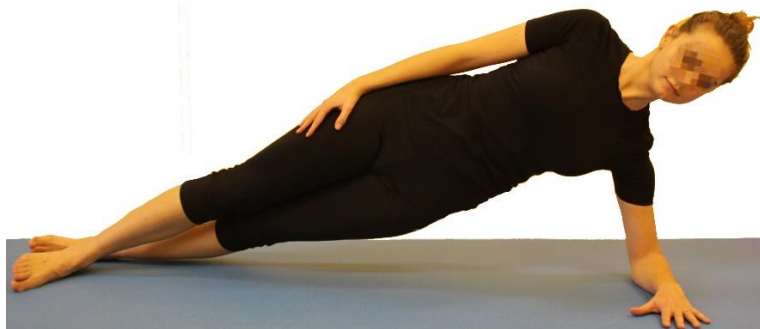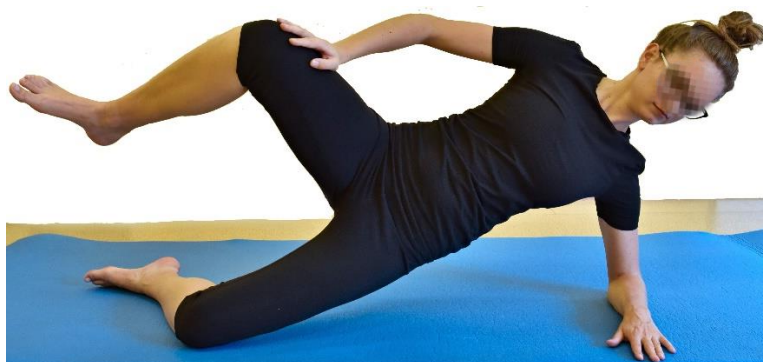

### The second exercise with increasing difficulty level

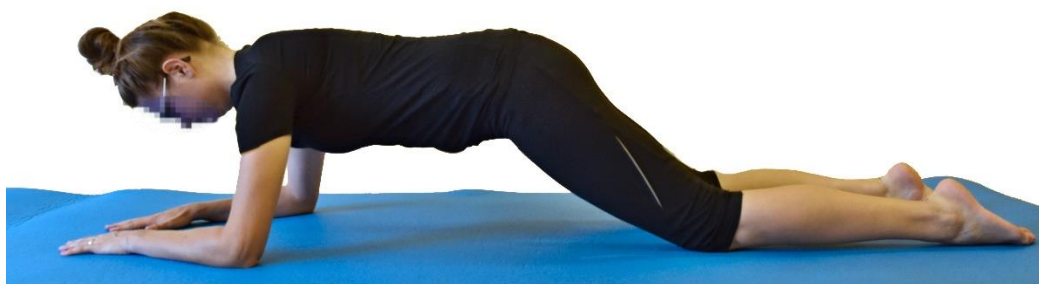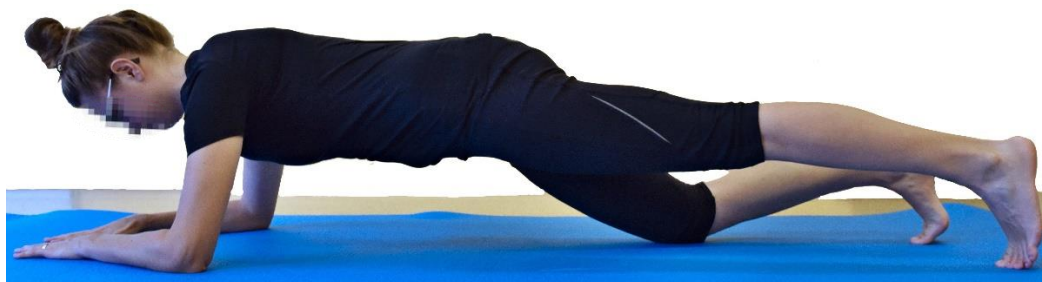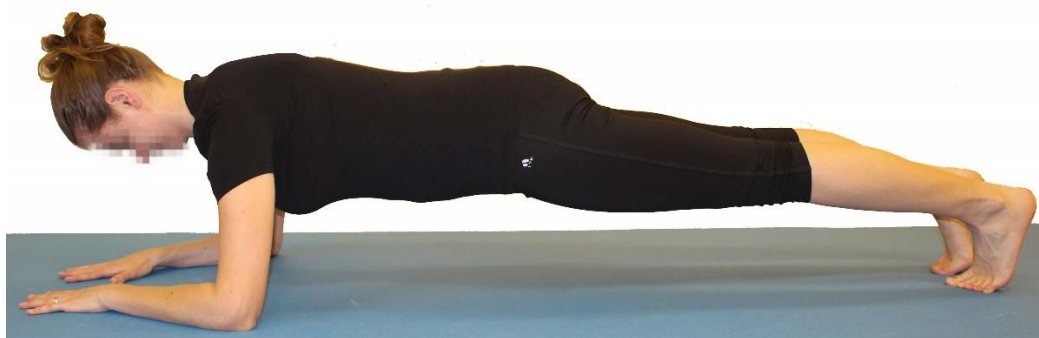

### The third exercise

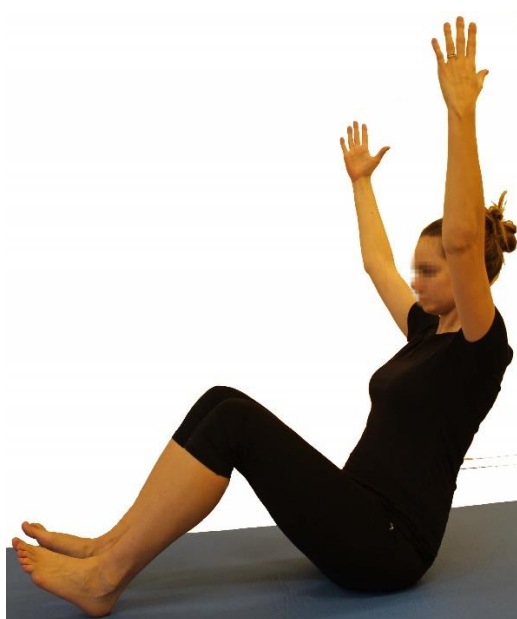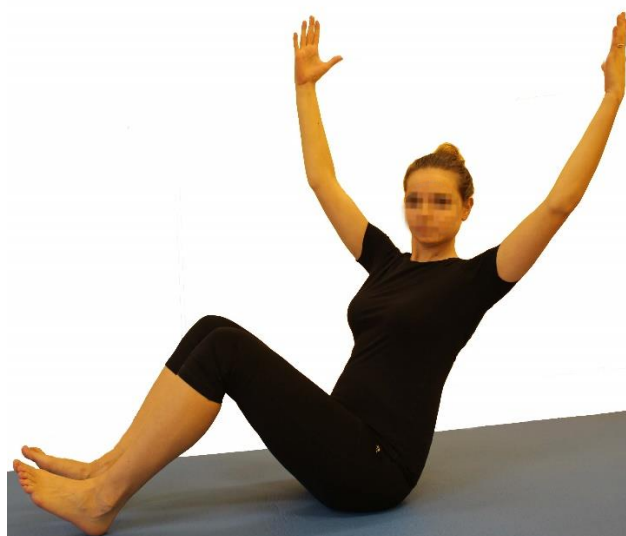

## Stretching exercises focused on the low back area

### The first stretching exercise

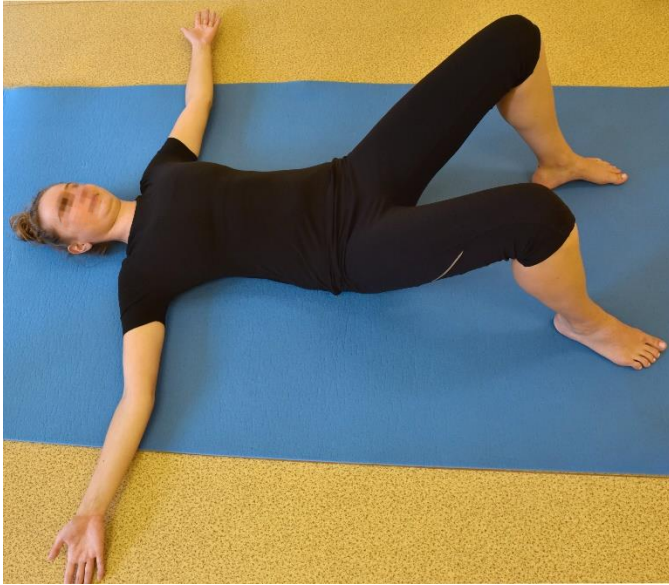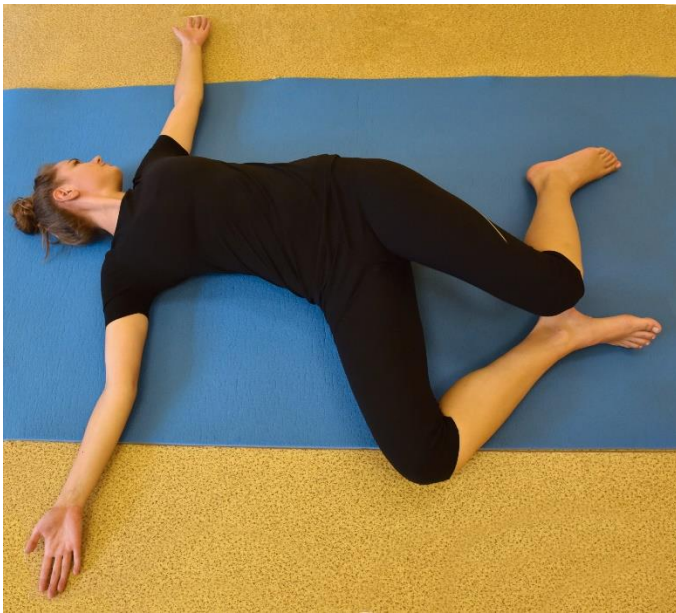

## The second stretching exercise

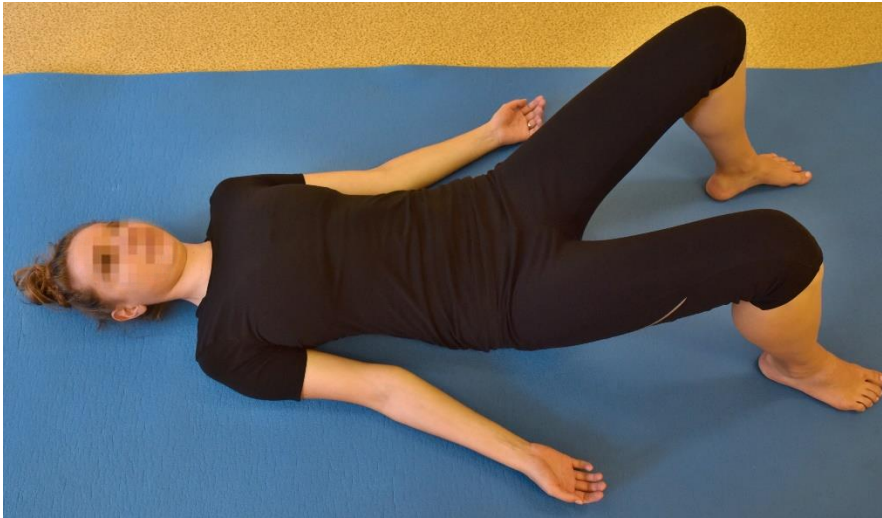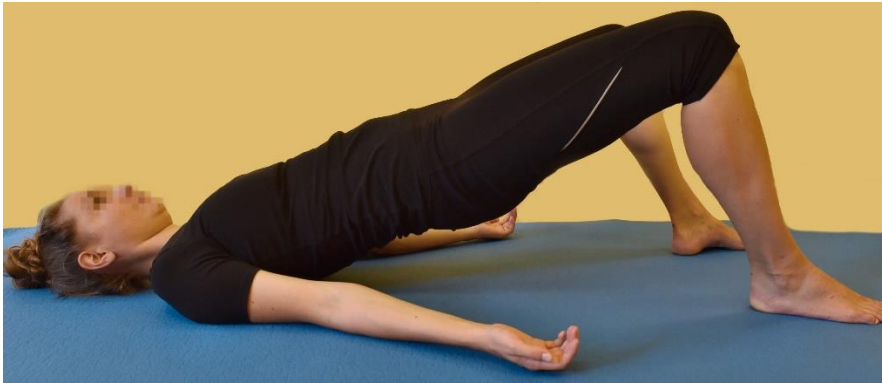

## **Respiratory muscle training:**

**Training focused on the correct breathing stereotype**

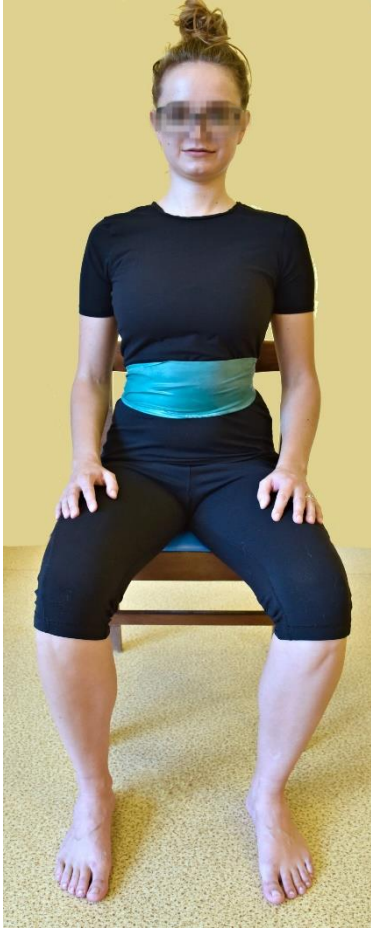

**Training with a Threshold IMT and PEP device**

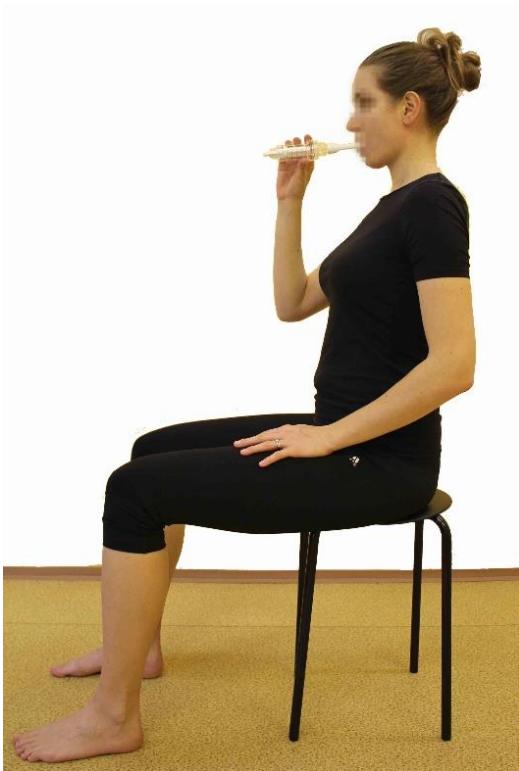

Supplement: s1 [file s1]
